# Supplementary material for: Recent advances in immunoassay-based mycotoxin analysis and toxicogenomic technologies
Source: PubMed Central journal article supplement — J Food Drug Anal. 2022 Nov 23;30(4):549–61. doi: 10.38212/2224-6614.3430 (PMC9910299; doi:10.38212/2224-6614.3430), 2022-11-23
Supplement: JFDA-30-04-549-s001.pdf [file JFDA-30-04-549-s001.pdf]

- Accurate mycotoxins analysis helps to avoid the contamination and reduce food wastage
- Co-occurrence of mycotoxins in food complicates the analysis in food chain
- Immunoassay technologies enable simultaneous analysis of multiple mycotoxins.
- Toxicogenomic provides better understanding on the effects of mycotoxins' exposure
